# Supplementary material
Source: Springer Nature journal article supplement (https://www.springermedizin.de/resource/supplementary/12889_2011_3945_MOESM2_ESM.pdf/9492570)
Supplement: MOESM2 [file 9492570]

| <b>Subjects</b>                                                                                                                                                                         | <b>Informed<br/>Consent</b> | <b>Baseline</b>                | <b>Follow up</b>                |
|-----------------------------------------------------------------------------------------------------------------------------------------------------------------------------------------|-----------------------------|--------------------------------|---------------------------------|
|                                                                                                                                                                                         | (day -14 to -1)             | (day 0)                        | (day 80 to 100)                 |
| <p><b>Group 1</b></p> <p>800 People with dementia (PwD) newly admitted to a facility and their informal caregivers (IC) or next of kin<br/>(100 PwD + 100 IC per group per country)</p> | <p>Informed<br/>consent</p> | <p>Baseline<br/>assessment</p> | <p>Follow up<br/>assessment</p> |
| <p><b>Group 2</b></p> <p>1400 PwD receiving professional home care and their IC or next of kin<br/>(150 PwD + 150 IC per group per country)</p>                                         | <p>Informed<br/>consent</p> | <p>Baseline<br/>assessment</p> | <p>Follow up<br/>assessment</p> |
